# Supplementary material for: Intrinsically photosensitive polyimide photoresist and its double crosslinking mechanism
Source: Royal Society of Chemistry journal article supplement (doi:10.1039/d4cc04749d), 2024-12-12
Supplement: d4cc04749d1.pdf [file d4cc04749d1.pdf]

## Supporting Information

# Intrinsically Photosensitive Polyimide Photoresist and Its Double Cross-linking Mechanism

Peng Yang,<sup>Δ\*</sup>a Haiping Yu,<sup>Δa</sup> Yuting Zhu,<sup>a</sup> Xiaonuo Liu,<sup>a</sup> Pin Liu,<sup>b</sup> Xu Wang,<sup>\*a</sup> and Bo Tang<sup>\*a</sup>

<sup>a</sup>Shandong Provincial Key Laboratory of Photoresistors, College of Chemistry, Chemical Engineering and Materials Science, Shandong Normal University, Jinan 250014, China.

<sup>b</sup>Suntific Materials, Ltd. Weifang, 261061, China.

### Table of contents

|                                                                    |    |
|--------------------------------------------------------------------|----|
| 1. General information .....                                       | 2  |
| 2. Synthesis of monomer .....                                      | 3  |
| 3. Synthesis of photosensitive polyimide (PSPI).....               | 8  |
| 4. Characterization of photosensitive polyimide (PSPI) .....       | 9  |
| 4.1. <sup>1</sup> H NMR spectra.....                               | 9  |
| 4.2. FT-IR absorption spectra .....                                | 11 |
| 4.3. Solubility .....                                              | 11 |
| 4.4. Molecular weight.....                                         | 12 |
| 4.5. TGA and DSC curves .....                                      | 12 |
| 4.6. UV-Vis absorption spectra .....                               | 13 |
| 4.7. Photosensitivity curve.....                                   | 13 |
| 4.8. Dielectric properties .....                                   | 14 |
| 4.9. Photolithographic formability properties.....                 | 15 |
| 5. Mimic the photoreaction of polyimide with small molecules ..... | 16 |
| 6. References .....                                                | 21 |

## 1. General information

All NMR spectra were acquired on Bruker AV 400 MHz NMR spectrometers. <sup>1</sup>H NMR chemical shifts were recorded relative to SiMe<sub>4</sub> (δ 0.00). Multiplicities were given as: s (singlet), d (doublet), t (triplet), q (quartet), dd (doublet of doublets) and m (multiplet). The number of protons (n) for a given resonance was indicated by nH. Coupling constants were reported as a *J* value in Hz. <sup>13</sup>C NMR chemical shifts were recorded relative to solvent resonance (CDCl<sub>3</sub>: δ 77.00). High-resolution mass spectrometry (HRMS) were recorded on a Bruker micro-TOF mass spectrometer using electrospray ionization (ESI), positive ion mode. Fourier transform infrared (FT-IR) Spectra were recorded on the Bruker ALPHA FT-IR Spectrometer, ranging from 500 to 4000 cm<sup>-1</sup>. Thermogravimetric analysis/differential scanning calorimeter (TGA/DSC) was carried out on TA/Q600 in N<sub>2</sub> atmosphere at 10°C min<sup>-1</sup> from 30°C to 800°C. Ultraviolet-visible (UV-Vis) spectra were performed on a Shimadzu UV-6100 spectrophotometer. Gel permeation chromatography (GPC) analysis was performed on Agilent 1260 equipped PLgel MIXED-C using DMA (HPLC grade) as the eluent at 35°C with a flow rate of 1 mL·min<sup>-1</sup>. Scanning electron microscope (SEM) images were recorded on a SU8010 instrument. Electrical properties were measured on a Keysight Agilent E4980A precision LCR meter.

Reagents 4,4'-dinitro-[1,1'-biphenyl]-2,2'-dicarboxylic acid, 2-hydroxyethyl methacrylate (HEMA), 3,3',4,4'-benzophenonetetracarboxylic dianhydride (BTDA) were purchased from Bide Pharmaceutical Technology Co. Ltd. (China) and stored in a N<sub>2</sub>-filled glove-box before use. N-methyl pyrrolidone (NMP) were dried over 4 Å molecular sieves. Unless noted otherwise, commercially available chemicals were used as received without purification. Flash column chromatographies were performed using the indicated solvent system on silica gel (200-300 mesh).

## 2. Synthesis of monomer

### Synthesis of 4,4'-dinitro-[1,1'-biphenyl]-2,2'-dicarbonyl dichloride (**2**)<sup>1</sup>

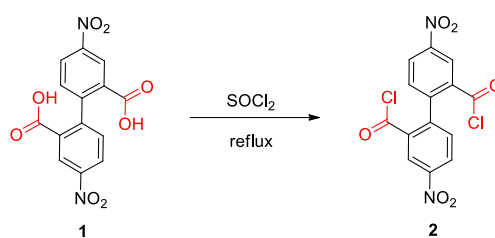

Under nitrogen atmosphere, a suspension of 4,4'-dinitro-[1,1'-biphenyl]-2,2'-dicarboxylic acid **1** (5.0 g, 15 mmol) in excess  $\text{SOCl}_2$  (150 mL) were heated to reflux until the disappearance of diacid **1**. The reaction mixture was cooled and concentrated under reduced pressure until all the  $\text{SOCl}_2$  had been removed to obtain crude product **2** as a white solid. Yield: 99 %. The product was directly used for the next step.

$^1\text{H}$  NMR (400 MHz,  $\text{DMSO-d}_6$ )  $\delta$  8.68 (d,  $J = 2.5$  Hz, 2H), 8.45 (dd,  $J = 8.4, 2.5$  Hz, 2H), 7.54 (d,  $J = 8.4$  Hz, 2H).

$^{13}\text{C}$  NMR (100 MHz,  $\text{DMSO-d}_6$ )  $\delta$  165.4, 148.0, 146.9, 131.6, 131.2, 126.0, 124.4

HRMS (ESI): calculated for  $\text{C}_{14}\text{H}_6\text{Cl}_2\text{N}_2\text{O}_6\text{Na}$   $[\text{M}+\text{Na}]^+$ : 390.9501, found: 390.9506.

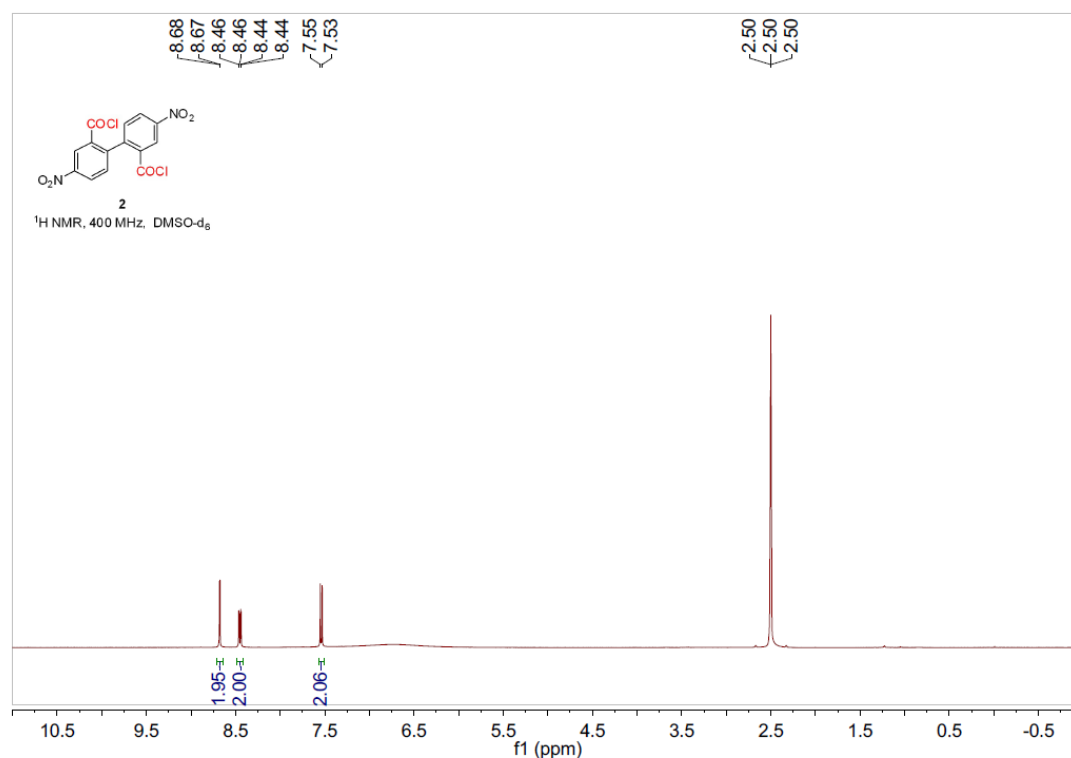

Figure S1.  $^1\text{H}$  NMR spectrum of compound **2**.

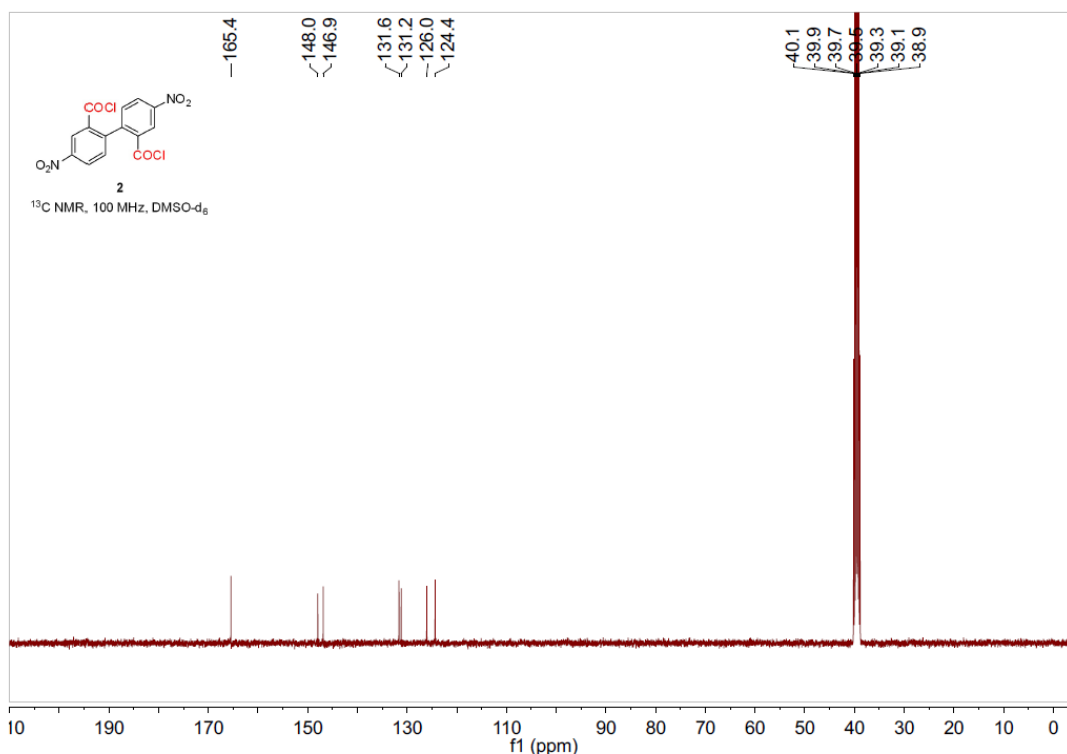

**Figure S2.** <sup>13</sup>C NMR spectrum of compound **2**.

### Synthesis of bis(2-(methacryloyloxy)ethyl) 4,4'-dinitro-[1,1'-biphenyl]-2,2'-dicarboxylate (**3**)<sup>2</sup>

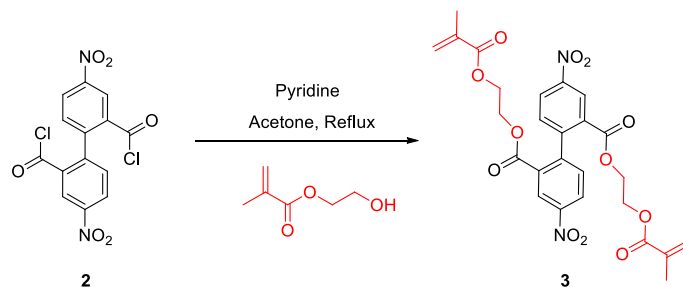

4,4'-Dinitro-[1,1'-biphenyl]-2,2'-dicarbonyl dichloride **2** (5.5 g, 15 mmol) and pyridine (1.2 mL, 15 mmol) were added to 7.2 mL of acetone at 0 °C. At the same temperature, 2-hydroxyethyl methacrylate (HEMA, 3.7 mL, 30 mmol) was added in drop-wise. Then the mixture was kept refluxing for 2 hours. After being cooled to room temperature, the reaction was quenched with water. The reaction mixture was extracted 3 times with dichloromethane (DCM) and dried by anhydrous Na<sub>2</sub>SO<sub>4</sub>. Solvent was removed and the residue was purified by silica gel column chromatography using ethyl acetate/hexane (5/1) as eluent. The product **3** is a yellow viscous liquid. Yield: 80%.

<sup>1</sup>H NMR (400 MHz, CDCl<sub>3</sub>) δ 8.92 (d, *J* = 2.3 Hz, 2H), 8.43 (dd, *J* = 8.4, 2.3 Hz, 2H), 7.40 (d, *J* = 8.4 Hz, 2H), 6.08 (s, 2H), 5.61 (s, 2H), 4.41-4.38 (m, 4H), 4.28-4.26 (m, 4H), 1.93 (s, 6H).

$^{13}\text{C}$  NMR (100 MHz,  $\text{CDCl}_3$ )  $\delta$  166.8, 163.9, 147.7, 147.4, 135.7, 130.8, 129.9, 126.4, 126.2, 125.5, 63.5, 61.9, 18.1.

HRMS (ESI): calculated for  $\text{C}_{26}\text{H}_{24}\text{N}_2\text{O}_{12}\text{Na}$   $[\text{M}+\text{Na}]^+$  : 579.1227, found: 579.1226.

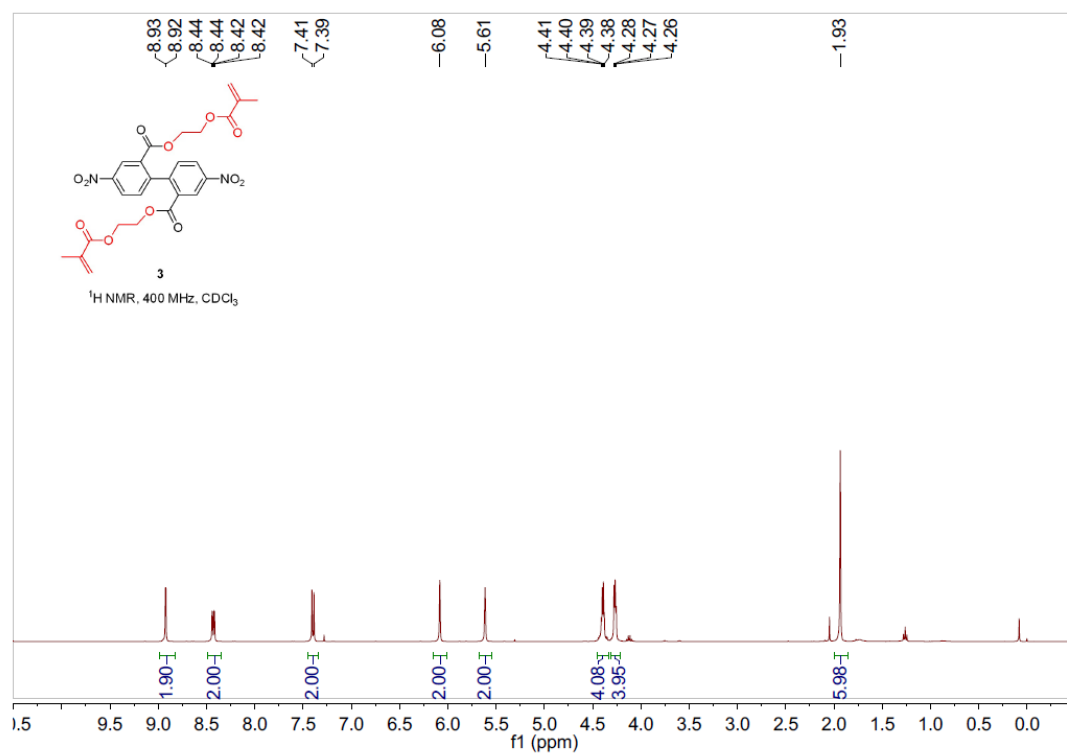

Figure S3.  $^1\text{H}$  NMR spectrum of compound 3.

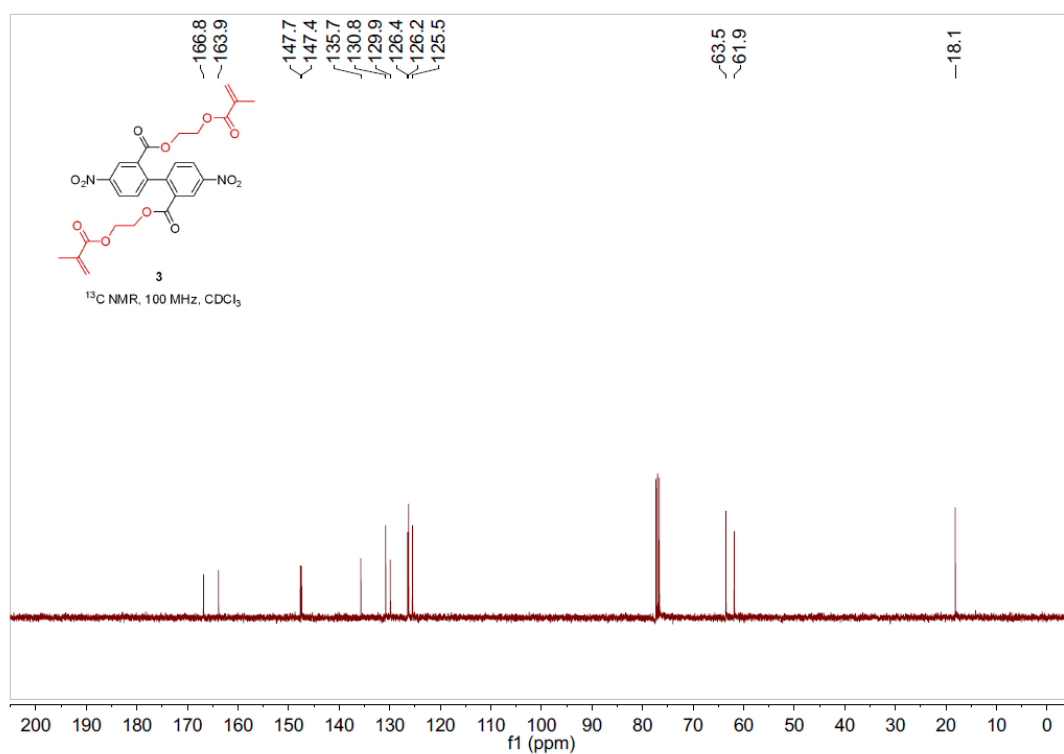

Figure S4.  $^{13}\text{C}$  NMR spectrum of compound 3.

## Synthesis of BMADA (4)<sup>2</sup>

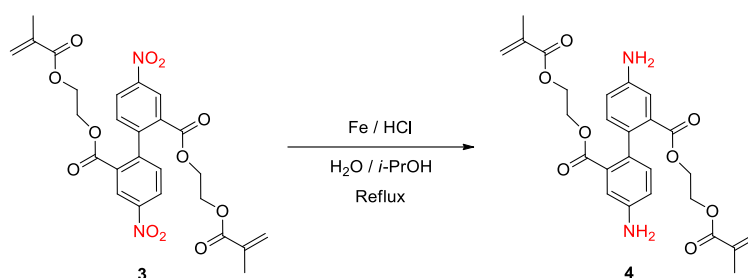

Under nitrogen atmosphere, compound **3** (3.9 g, 7 mmol), iron powder (3.9 g, 70 mmol, 100 mesh) and concentrated HCl (70  $\mu$ L) were added to *i*-PrOH/water (11.2 mL/2.8 mL) and the mixture was heated to reflux for 15 minutes. After cooled to room temperature, an additional concentrated HCl (70  $\mu$ L) and iron powder (3.9g, 70 mmol, 100 mesh) were added to the reaction mixture. The reaction mixture was heated to reflux for one hour. After the full consumption of **3**, the mixture was filtered to remove the excess iron powder. Then the mixture was extracted 3 times with dichloromethane (DCM) and dried by anhydrous Na<sub>2</sub>SO<sub>4</sub>. Solvent was removed and the residue was purified by silica gel column chromatography using ethyl acetate/hexane (1/1) as eluent. The product **4** is a yellow viscous liquid. Yield: 76%.

<sup>1</sup>H NMR (400 MHz, CDCl<sub>3</sub>)  $\delta$  7.25 (d,  $J$  = 2.3 Hz, 2H), 6.95 (d,  $J$  = 8.1 Hz, 2H), 6.77 (dd,  $J$  = 8.1, 2.4 Hz, 2H), 6.07 (s, 2H), 5.57 (s, 2H), 4.26-4.22 (m, 4H), 4.07-4.03 (m, 4H), 3.78 (s, 4H), 1.92 (s, 6H).

<sup>13</sup>C NMR (100 MHz, CDCl<sub>3</sub>)  $\delta$  167.1, 167.0, 145.2, 135.9, 133.3, 131.6, 130.2, 125.9, 118.1, 116.1, 62.4, 62.0, 18.2.

HRMS (ESI): calculated for C<sub>26</sub>H<sub>28</sub>N<sub>2</sub>O<sub>8</sub>Na [M+Na]<sup>+</sup> : 519.1743, found: 519.1741.

FT-IR (cm<sup>-1</sup>): 3370, 3461 (H-N-H, NH<sub>2</sub>), 1702 (C=O, COOR), 1626 (C=C), 1164 (C-O-C)

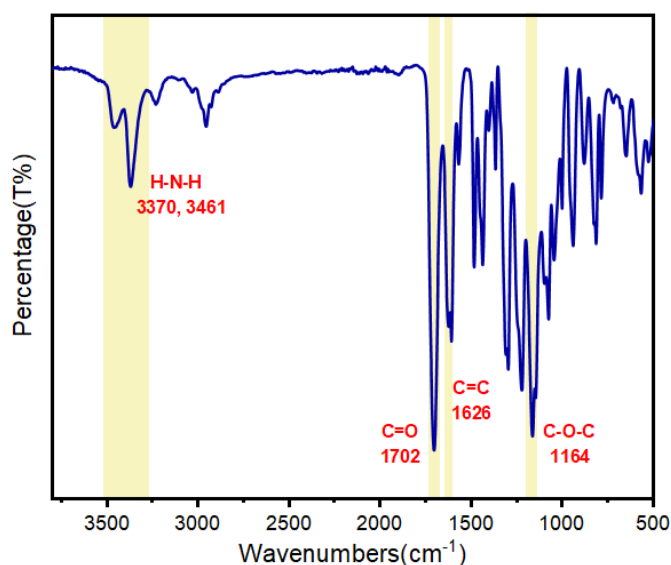

**Figure S5.** FT-IR spectrum of compound **4** (BMADA).

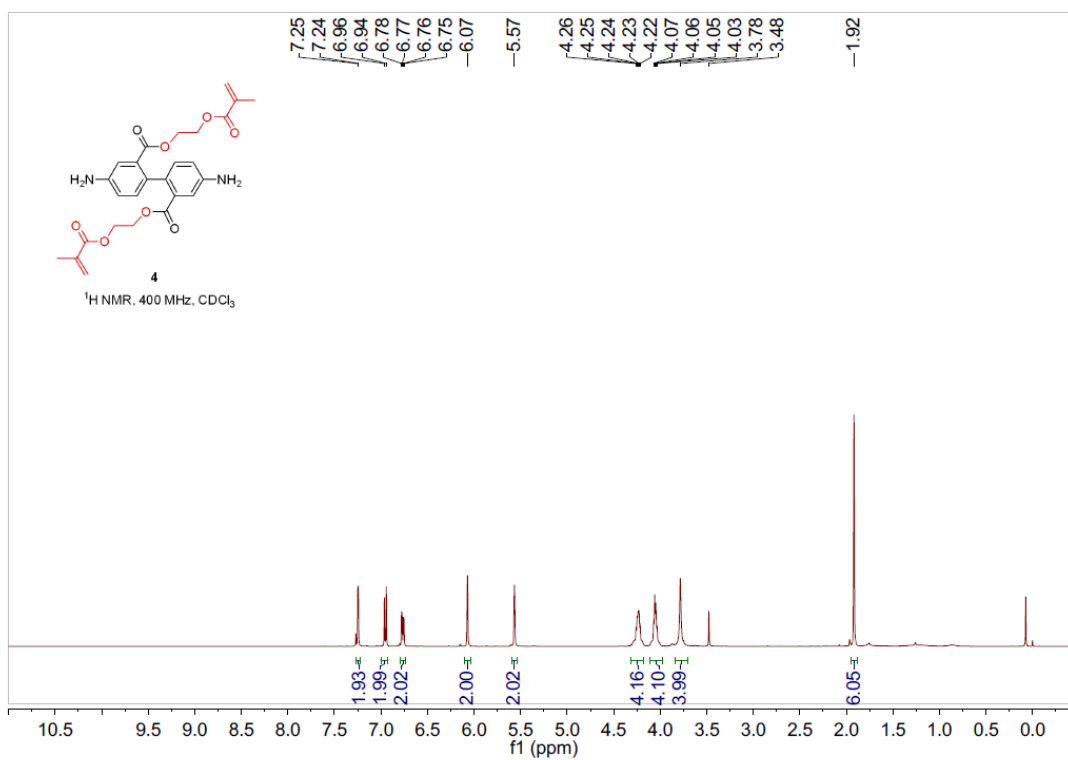

**Figure S6. <sup>1</sup>H NMR spectrum of compound 4 (BMADA).**

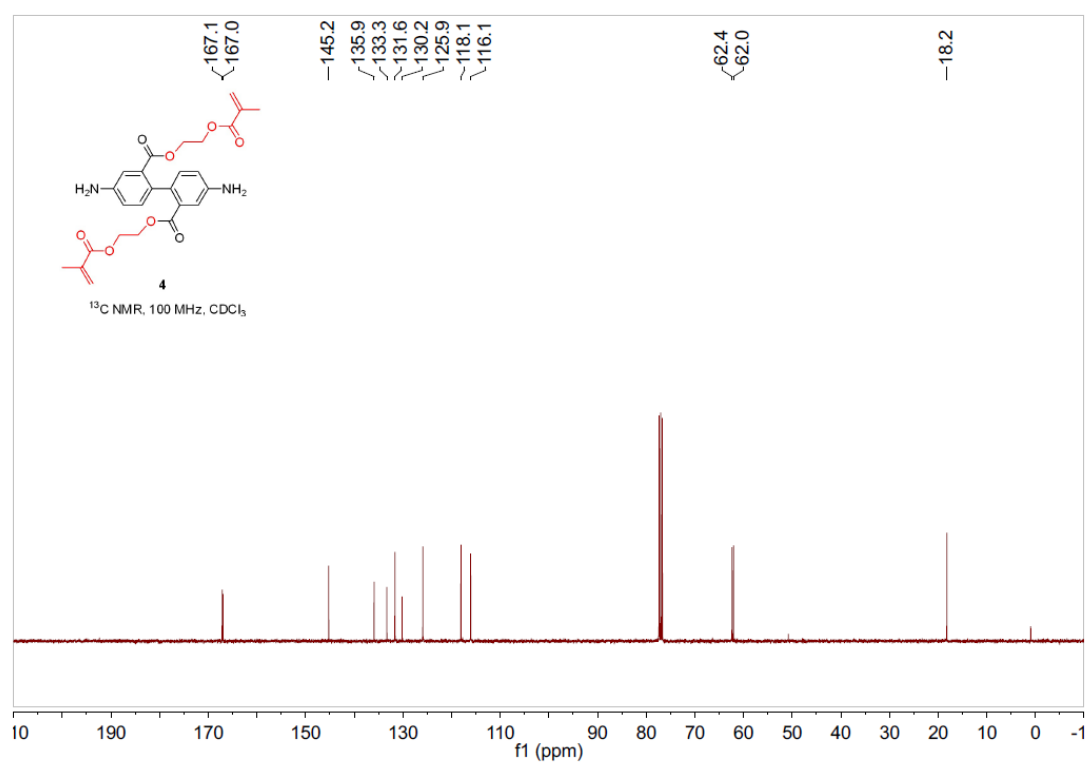

**Figure S7. <sup>13</sup>C NMR spectrum of compound 4 (BMADA).**

### 3. Synthesis of photosensitive polyimide (PSPI)<sup>3</sup>

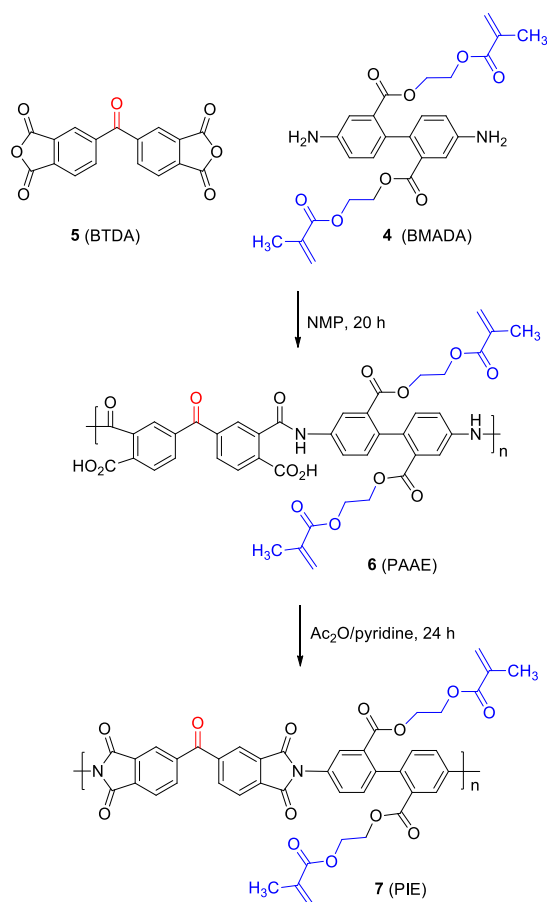

#### Synthesis of poly(amic acid ester) 6 (PAAE)

Under nitrogen atmosphere, BMADA **4** (3.0 g, 6 mmol) was added into a 100 mL flask containing ultra-dry NMP (20 mL). Transparent BMADA **4** solution was then obtained after stirring at 10 °C for 30 minutes. Then BTDA **5** (2.0 g, 6 mmol) was added with an additional NMP (7.6 mL) to give a reaction mixture with 15 wt% solid content. The temperature of the reaction mixture was increased to room temperature (25 °C) and the polymerization system was stirred at such temperature for 20 h to afford a highly viscous solution. The homogeneous PAAE **6** solution was then successively poured into aqueous ethanol solution (200 mL, 75 vol%) to afford the filament resin. The reaction was filtered and washed three times with methanol to obtain a yellow viscous solid. Then the yellow viscous solid was collected and dried at 60°C in vacuum overnight. The product **6** is a yellow solid.

<sup>1</sup>H NMR (400 MHz, DMSO-d<sub>6</sub>) δ 13.50 (brs, 2H), 10.78 (s, 2H), 8.30-8.26 (m, 3H), 8.11-8.06 (m, 2H), 8.01-7.94 (m, 2H), 7.87-7.81 (m, 3H), 7.19 (s, 2H), 5.97 (s, 2H), 5.65 (s, 2H), 4.25 (s, 4H), 4.09 (s, 4H), 1.84 (s, 6H).

FT-IR (cm<sup>-1</sup>): 1707 (C=O, COOH), 1655 (C=O, CONH), 1523 (C-N).



## Synthesis of polyimide ester 7(PIE)

Under nitrogen atmosphere, BMADA **4** (3.0 g, 6 mmol) was added into a 100 mL flask containing ultra-dry NMP (20 mL). Transparent diamine **4** solution was then obtained after stirring at 10 °C for 30 minutes. Then BTDA **5** (2.0 g, 6 mmol) was added with an additional NMP (7.6 mL) to give a reaction mixture with 15 wt% solid content. The temperature of the reaction mixture was increased to room temperature (25°C) and the polymerization system was stirred at such temperature for 20 h to afford a highly viscous solution. Then, the dehydration system of acetic anhydride (Ac<sub>2</sub>O) (2.8 mL, 30 mmol), pyridine (1.9 mL, 24 mmol) and extra ultra-dry NMP (20 mL) were added to the solution, and the reaction mixture was stirred at 50 °C for another 24 h. The homogeneous PIE **7** solution was then successively poured into aqueous ethanol solution (200 mL, 75 vol%) to afford the filament resin. The resin was filtered and washed three times with methanol to obtain a yellow solid. Then the yellow solid was collected and dried at 60°C in vacuum overnight. The product **7** is a faint yellow solid.

<sup>1</sup>H NMR (400 MHz, DMSO-d<sub>6</sub>) δ 8.33-8.31 (m, 2H), 8.27-8.21 (m, 4H), 8.13 (s, 2H), 7.79 (d, *J* = 8.2 Hz, 2H), 7.50 (d, *J* = 7.6 Hz, 2H), 5.96 (s, 2H), 5.64 (s, 2H), 4.28-4.27 (m, 2H), 4.13 (s, 2H), 1.81 (s, 6H).

FT-IR (cm<sup>-1</sup>): 1776 (C=O), 1707 (C=O), 1363 (C-N-C), 717 (imide ring).

## 4. Characterization of photosensitive polyimide (PSPI)

### 4.1. <sup>1</sup>H NMR spectra

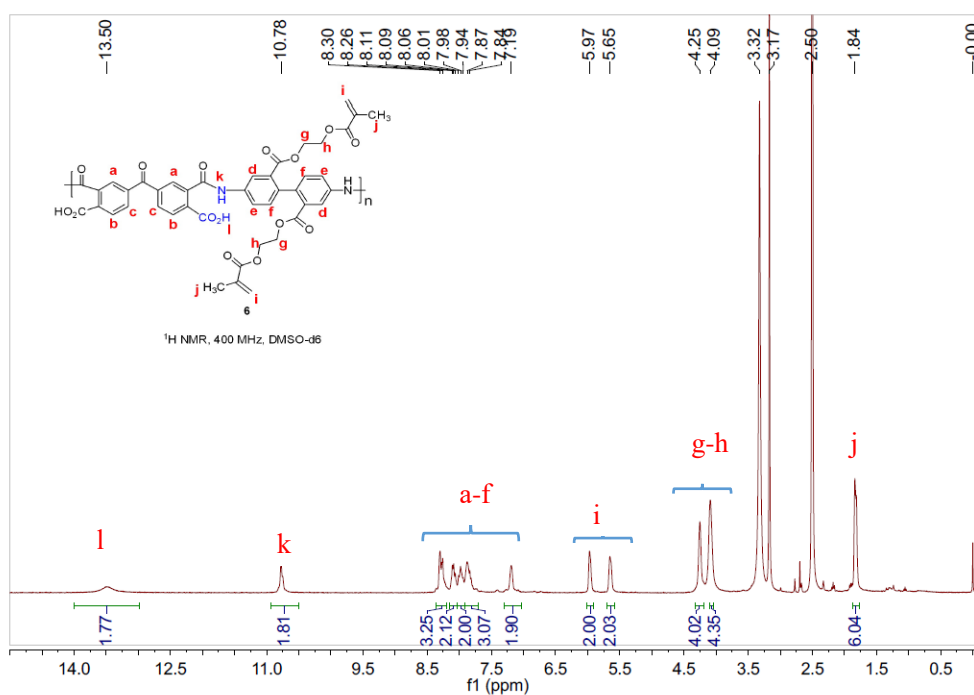

Figure S8.  $^1\text{H}$  NMR spectrum of 6.

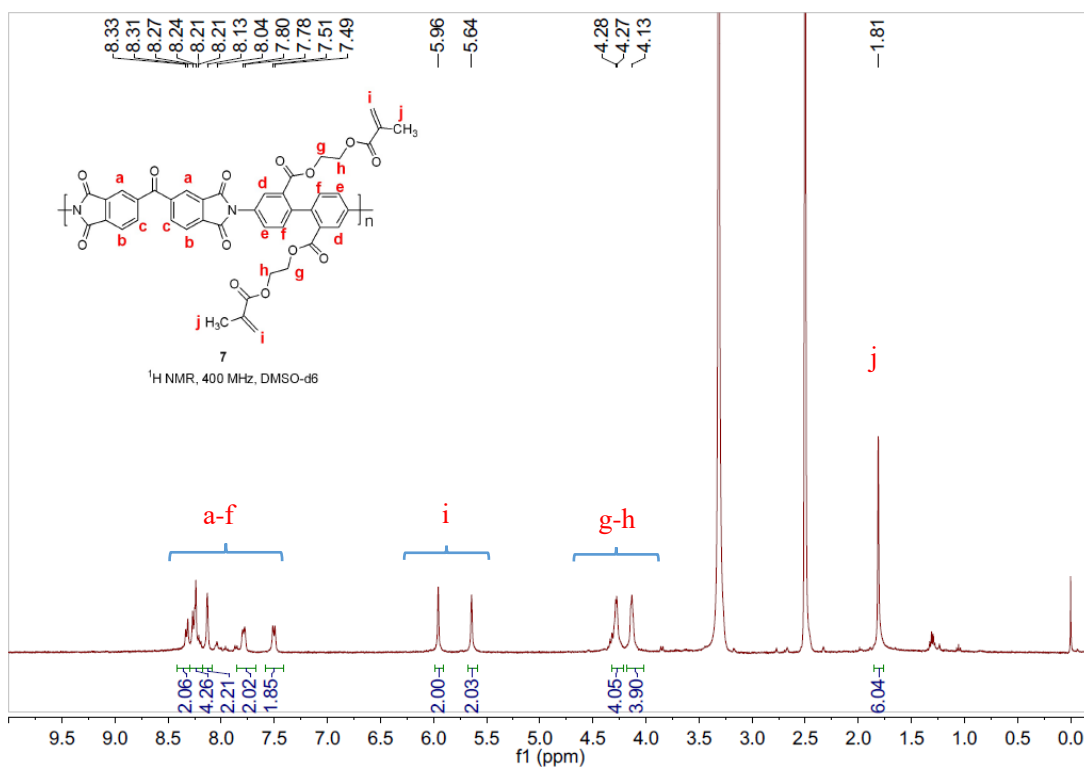

Figure S9.  $^1\text{H}$  NMR spectrum of 7 in DMSO- $d_6$ .

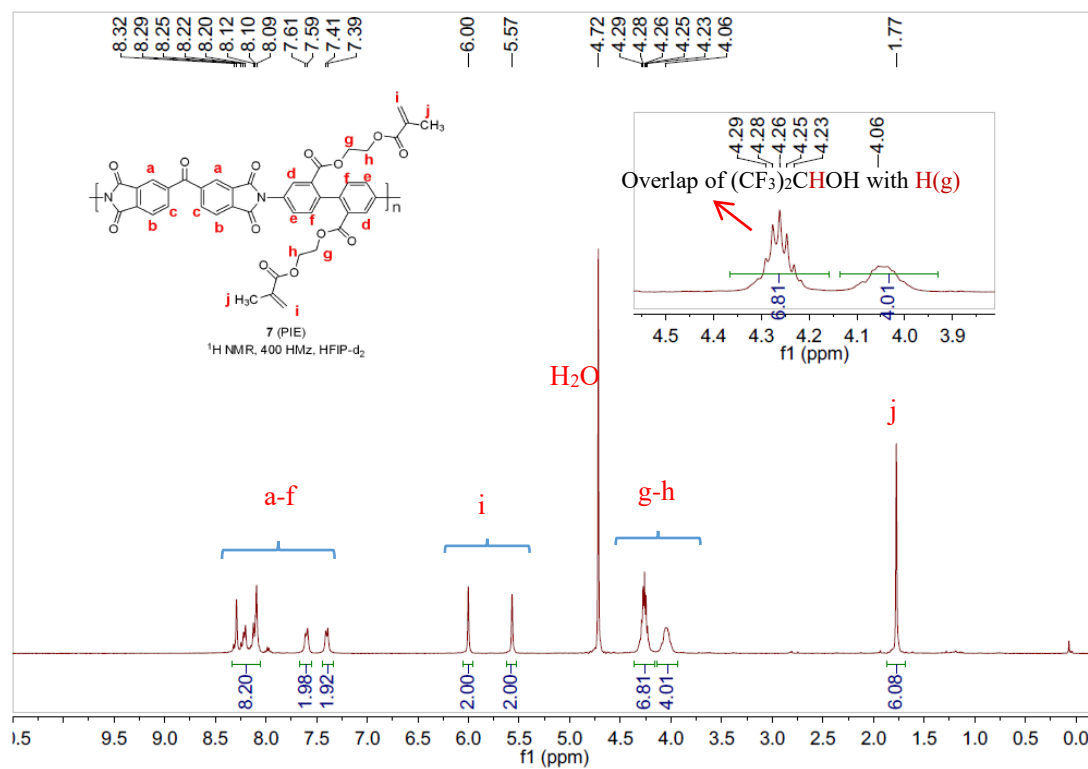

Figure S10.  $^1\text{H}$  NMR spectrum of 7 in HFIP- $d_2$ .

## 4.2. FT-IR absorption spectra

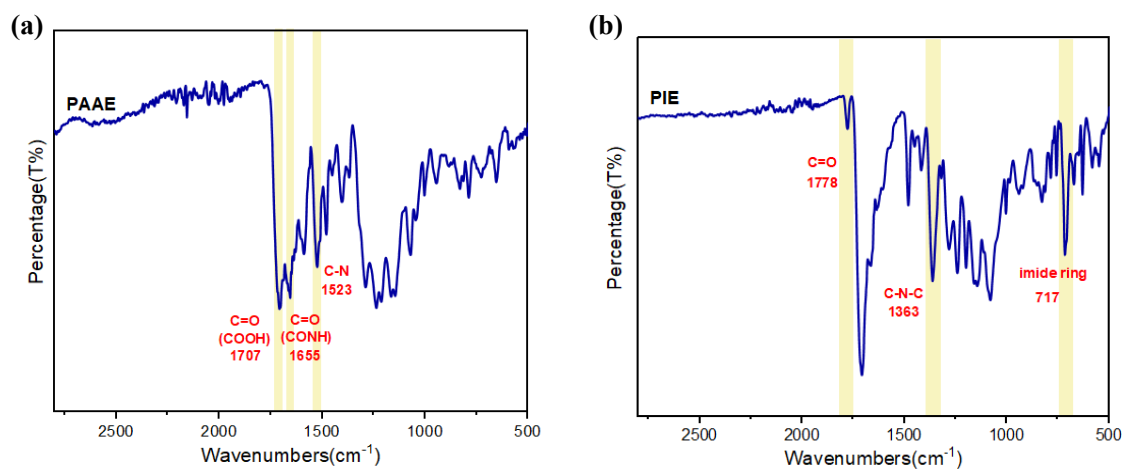

**Figure S11.** (a) FT-IR spectrum of **6**; (b) FT-IR spectrum of **7**.

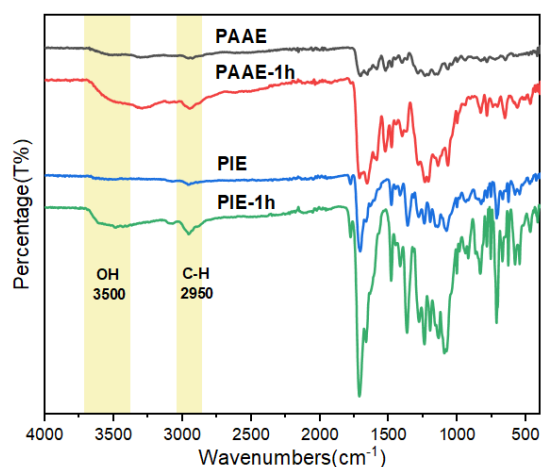

**Figure S12.** FT-IR spectra of PAAE **6** and PIE **7** films before and after 365 nm UV-light irradiation

## 4.3. Solubility

**Table S1.** Dissolution performance of **6** and **7**.

|      | Solubility |      |     |     |      |                  |      |      |
|------|------------|------|-----|-----|------|------------------|------|------|
|      | NMP        | HFIP | DMA | DMF | DMSO | H <sub>2</sub> O | MeOH | EtOH |
| PAAE | ++         | +/-  | +/- | +/- | +/-  | --               | --   | --   |
| PIE  | ++         | ++   | +/- | +/- | +/-  | --               | --   | --   |

Qualitative solubility was determined with 5 mg of polymer in 0.5 mL of solvent.

++: dissolved completely; +/-: dissolved partly; --: insoluble completely.

NMP: N-methyl-2-pyrrolidone; HFIP: 1,1,1,3,3,3-hexafluoro-2-propanol;

DMA: N,N-dimethylacetamide; DMF: N,N-dimethylformamide; DMSO: dimethyl sulfoxide;

H<sub>2</sub>O: primary water; MeOH: methanol; EtOH: ethanol.

#### 4.4. Molecular weight

**Table S2.** Molecular weight of **6** and **7**.

| sample   | $M_n$ (g/mol) | $M_w$ (g/mol) | PDI  |
|----------|---------------|---------------|------|
| <b>6</b> | 13355         | 29696         | 2.22 |
| <b>7</b> | 8336          | 12007         | 1.44 |

$M_n$ : Number average molecular weight;  $M_w$ : Weight average molecular weight,  
PDI: Polydispersity index,  $PDI = M_w/M_n$ .

#### 4.5. TGA and DSC curves

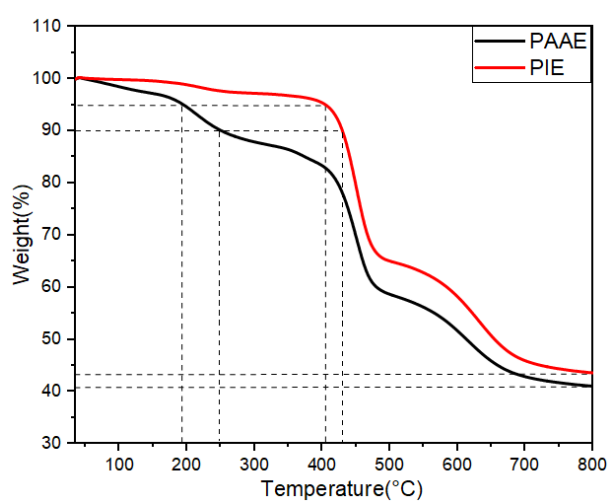

**Figure S13.** Thermogravimetric analysis (TGA) curves of PAAE **6** and PIE **7**.

(The heating rate is 10 °C/min. PAAE- $T_{5\%}$  = 195 °C, PAAE- $T_{10\%}$  = 250 °C, PAAE- $R_{w800}$  = 41%  
PIE- $T_{5\%}$  = 405 °C, PIE- $T_{10\%}$  = 430 °C, PIE- $R_{w800}$  = 44%.)

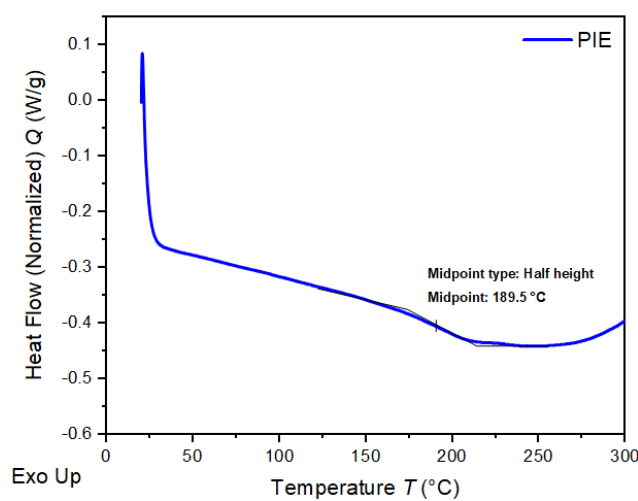

**Figure S14.** Differential Scanning Calorimetry (DSC) curve of **7**.

(The second round heating. The heating rate is 20 °C/min.)

#### 4.6. UV-Vis absorption spectra

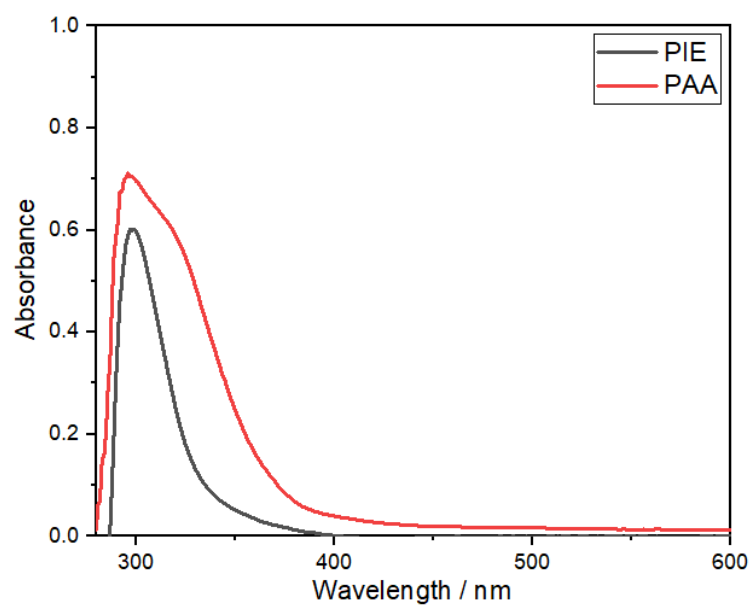

**Figure S15.** UV-vis absorption spectra of **6** and **7**.

PAAE- $\lambda_{\max}$  = 296 nm, PIE- $\lambda_{\max}$  = 299 nm.

#### 4.7. Photosensitivity curve

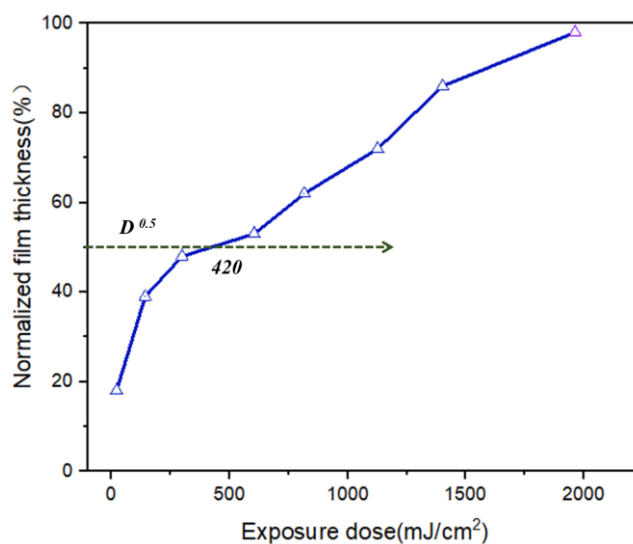

**Figure S16.** Characteristic UV-exposure curve of **6** (PAAE).

The photosensitivity was evaluated by the irradiation of the films with 365 nm UV-light and subsequent determination of the insoluble fraction after development as a function of exposure dose.

The exposure energy to attain a 0.5 gel fraction is about 420 mJ/cm<sup>2</sup>

#### 4.8. Dielectric properties

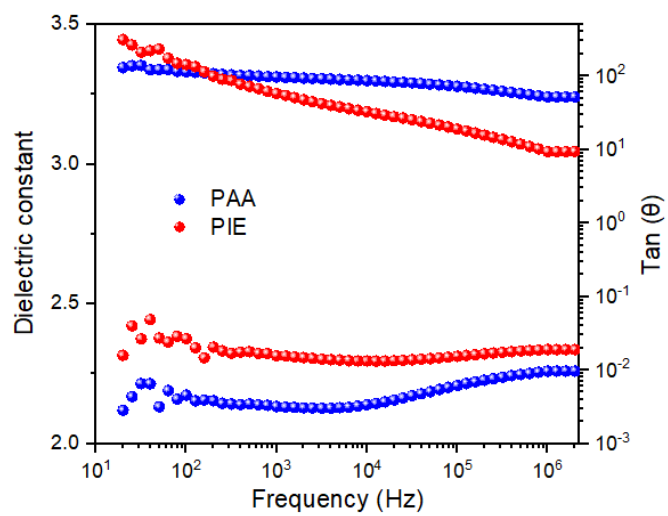

**Figure S17.** The dielectric constant curves of PAAE **6** and PIE **7**.

## 4.9. Photolithographic formability properties

### Preparation of photoresist

PAAE 6 (1.0 g), OXE-1 (BASF, 0.01 g), dipentaerythritol hexaacrylate (0.03 g) and vinyltrimethoxysilane (0.1 g) were added to 9 g NMP solvent. The solution was sonicated for 1 hour. The photosensitive polymer solution was filtered through a 0.45  $\mu\text{m}$  polytetrafluoroethylene membrane to remove impurities and obtain a completely dissolved homogeneous solution. (note: in our lab, a pure solution of PAAE 6 in NMP without any additives was used to demonstrate its photolithographic formability properties. But in industry, a small amount crosslinker (1%) and photoinitiator (0.1%) were added to the photoresist solution in order to compliant with industrial process/equipment and make better photolithographic patterns. The amount of additives is much lower than that of commercial photoresist.)

**Table S3.** Photolithographic process and the corresponding parameters.

| Process      | Parameters                               |
|--------------|------------------------------------------|
| Spin-coating | 1000 r/20 s                              |
| Soft-bake    | 100 °C×3 min 480 nm                      |
| Exposure     | i-line, 600 mj/cm <sup>2</sup>           |
| Develop      | 1% Na <sub>2</sub> CO <sub>3</sub> , 14s |

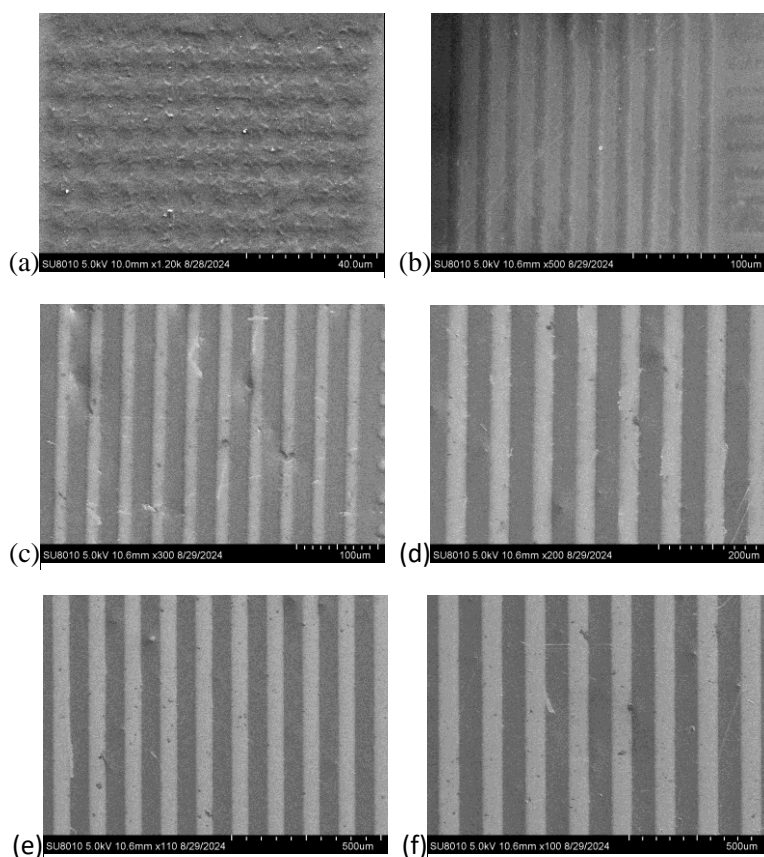

**Figure S18.** SEM photos of micro-patterns with different line width formed by PAAE 6. (a) 5  $\mu\text{m}$  line width; (b) 10  $\mu\text{m}$  line width; (c) 20  $\mu\text{m}$  line width; (d) 40  $\mu\text{m}$  line width; (e) 60  $\mu\text{m}$  line width; (f) 80  $\mu\text{m}$  line width.

## 5. Mimic the photoreaction of polyimide with small molecules

(1) neat conditions:

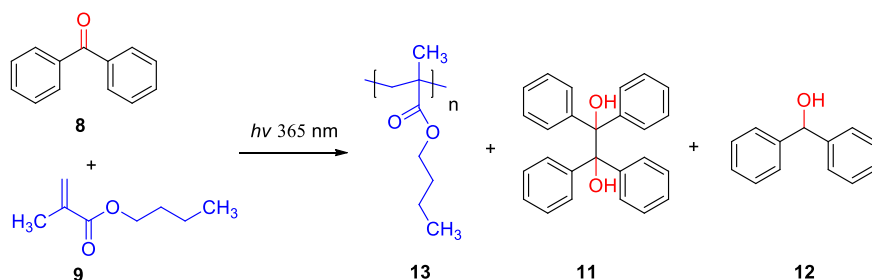

Under nitrogen atmosphere, benzophenone **8** (0.6 mmol, 109.4 mg) was dissolved in butyl methacrylate **9** (1.2 mmol, 191  $\mu$ L). The homogeneous solution was exposed to a high-pressure ultraviolet lamp for 1 h. After completion of the reaction, the reaction mixture was diluted with 1 mL of ethyl acetate (EA) and separated by preparative TLC using ethyl acetate/hexane (1/10) as eluent. Three main products including poly(butyl methacrylate) **13** ( $R_f = 0.06$ , generally on the starting line of the TLC plate), benzopinacol **11** ( $R_f = 0.38$ ), and phenylethanol **12** ( $R_f = 0.25$ ) were obtained. The structures were determined by  $^1\text{H}$  and  $^{13}\text{C}$  NMR analysis.

(2) diluted conditions:

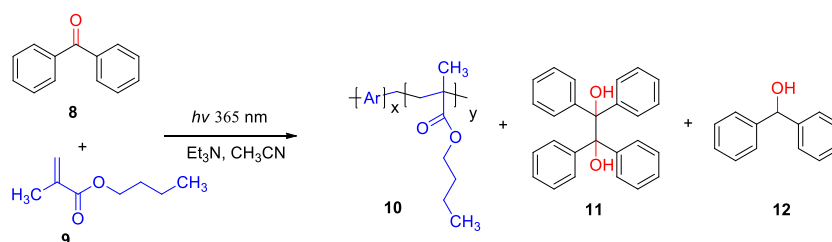

Under nitrogen atmosphere, benzophenone **8** (0.3 mmol, 54.7 mg), butyl methacrylate **9** (0.6 mmol, 95.4  $\mu$ L),  $\text{Et}_3\text{N}$  (0.3 mmol, 41.7  $\mu$ L) and acetonitrile (2 mL) were charged in a glass vial. The reaction mixture was exposed to a high-pressure ultraviolet lamp for 1 h. After completion of the reaction, the solvent was partially removed and the residue was purified by preparative TLC using ethyl acetate/hexane (1/10) as eluent. Three main products including benzophenone-methacrylate copolymer **10** ( $R_f = 0.01-0.5$ , the  $R_f$  of unknown polymer **10** varies in different experiment batches), benzopinacol **11** ( $R_f = 0.38$ ), and phenylethanol **12** ( $R_f = 0.25$ ) were obtained.

The poly(butyl methacrylate) **13** is a sticky gel. The NMR data is consistent with the literature reports.<sup>4</sup>

$^1\text{H}$  NMR (400 MHz,  $\text{CDCl}_3$ )  $\delta$  3.95-3.94 (m, 2H), 1.91-1.81 (m, 2H), 1.67-1.61 (m, 2H), 1.41-1.39 (m, 2H), 1.03-1.87 (m, 6H).



$^{13}\text{C}$  NMR (100 MHz,  $\text{CDCl}_3$ )  $\delta$  176.5, 63.7, 53.1, 43.7, 29.2, 18.3, 12.7, 12.7.

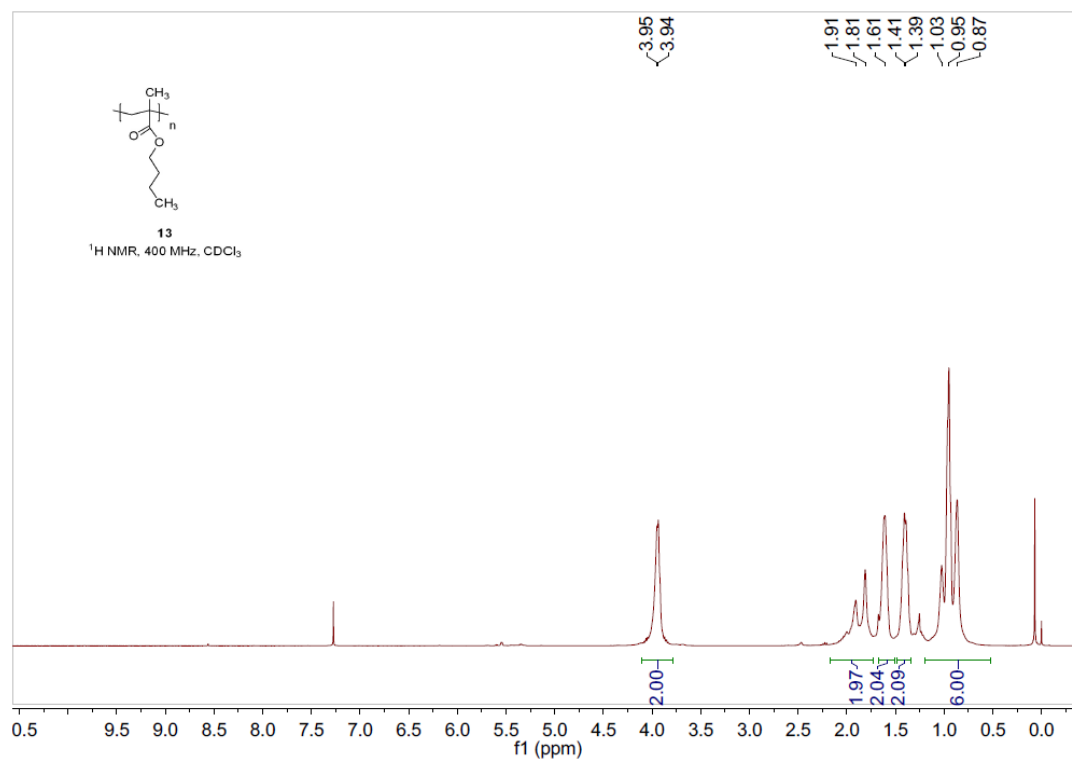

**Figure S19.**  $^1\text{H}$  NMR spectrum of **13**.

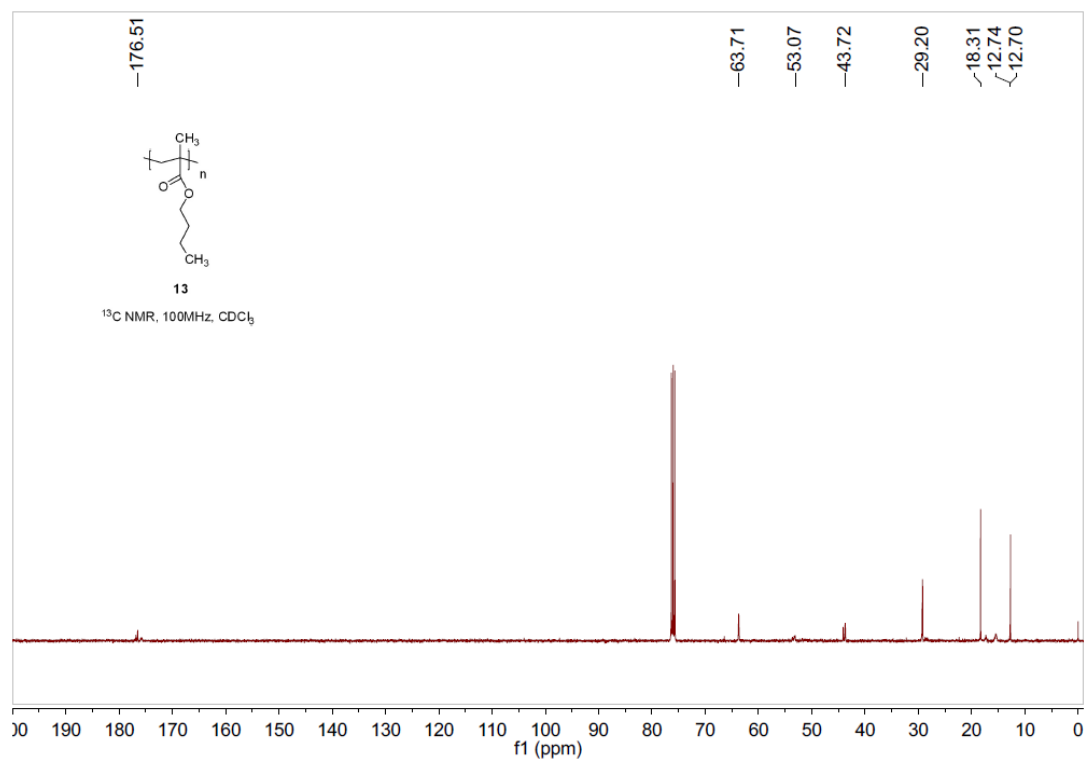

**Figure S20.**  $^{13}\text{C}$  NMR spectrum of **13**.

The polymer **10** is a colorless liquid. We carried out numerous rounds of experiments and discovered that the structure of **10** obtained each time was diverse. In the  $^1\text{H}$  NMR spectrum of **10**, the ratio of hydrogen numbers in the aromatic part to those in the aliphatic part varies each time. The molecular weight ( $M_n$ ) of co-polymer **10** in a batch was measured by GPC to be 2191 g/mol.

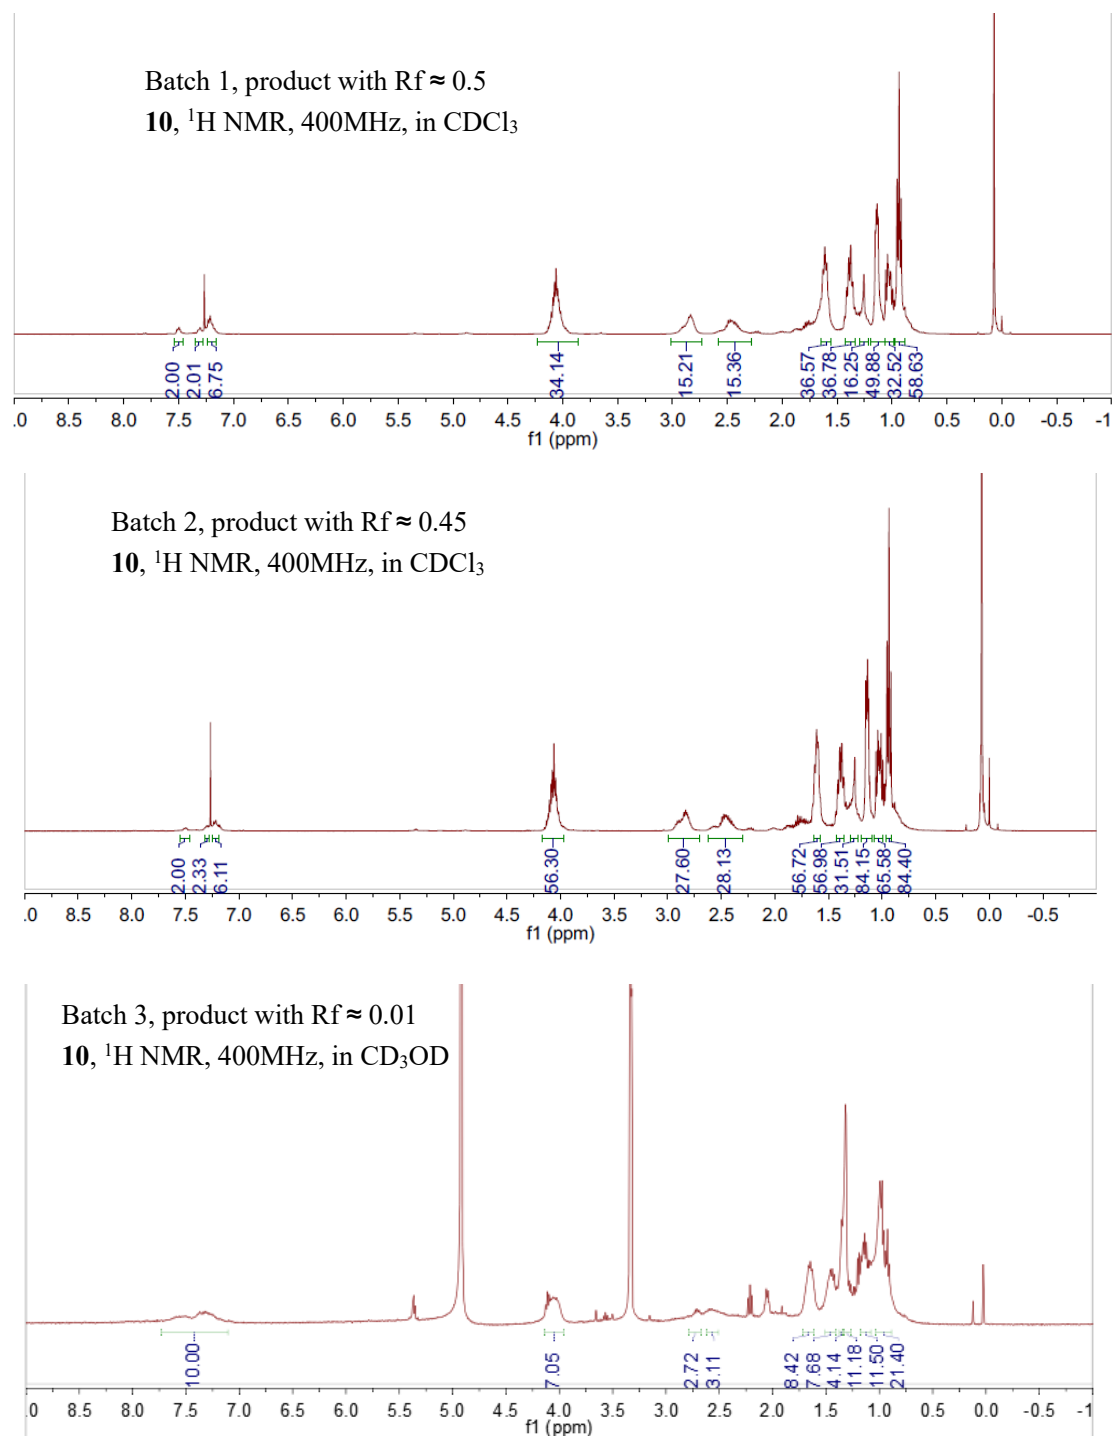

**Figure S21.**  $^1\text{H}$  NMR spectra of **10** obtained from three separate batches.

Benzopinacolone **11** is a white solid. The NMR data is consistent with the literature reports.<sup>5</sup>

<sup>1</sup>H NMR (400 MHz, CDCl<sub>3</sub>) δ 7.31–7.28 (m, 8H), 7.20–7.15 (m, 12H), 3.03 (s, 2H).

<sup>13</sup>C NMR (100 MHz, CDCl<sub>3</sub>) δ 144.1, 128.6, 127.3, 126.9, 83.0.

HRMS (ESI): calculated for C<sub>26</sub>H<sub>22</sub>O<sub>2</sub>Na [M+Na]<sup>+</sup> : 389.1517, found: 389.1518.

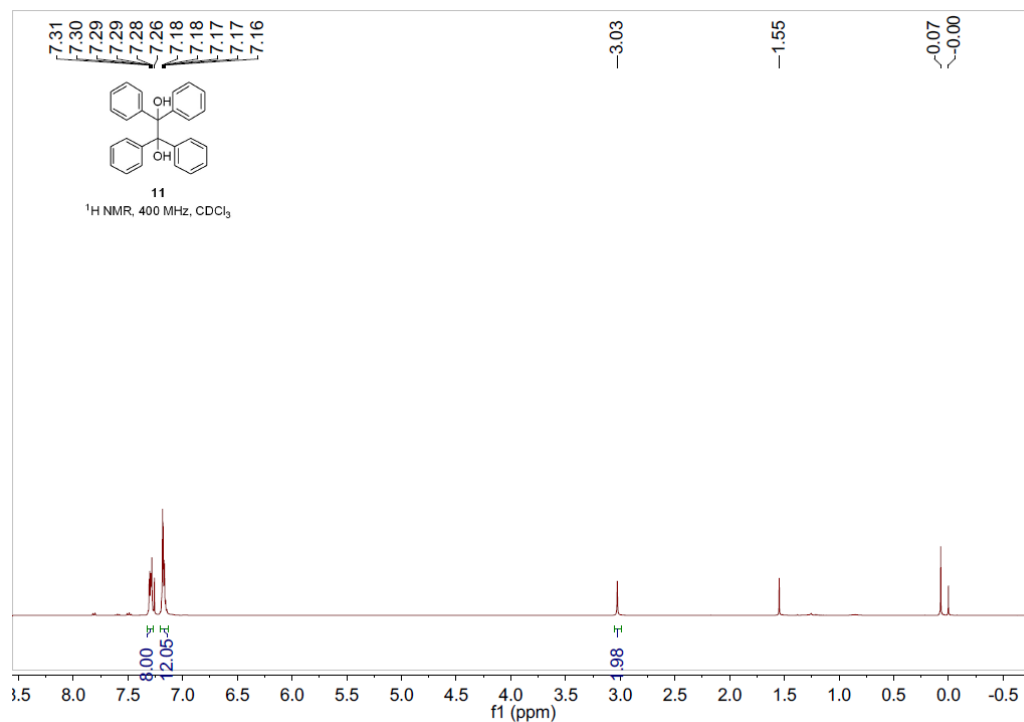

Figure S22. <sup>1</sup>H NMR spectrum of **11**.

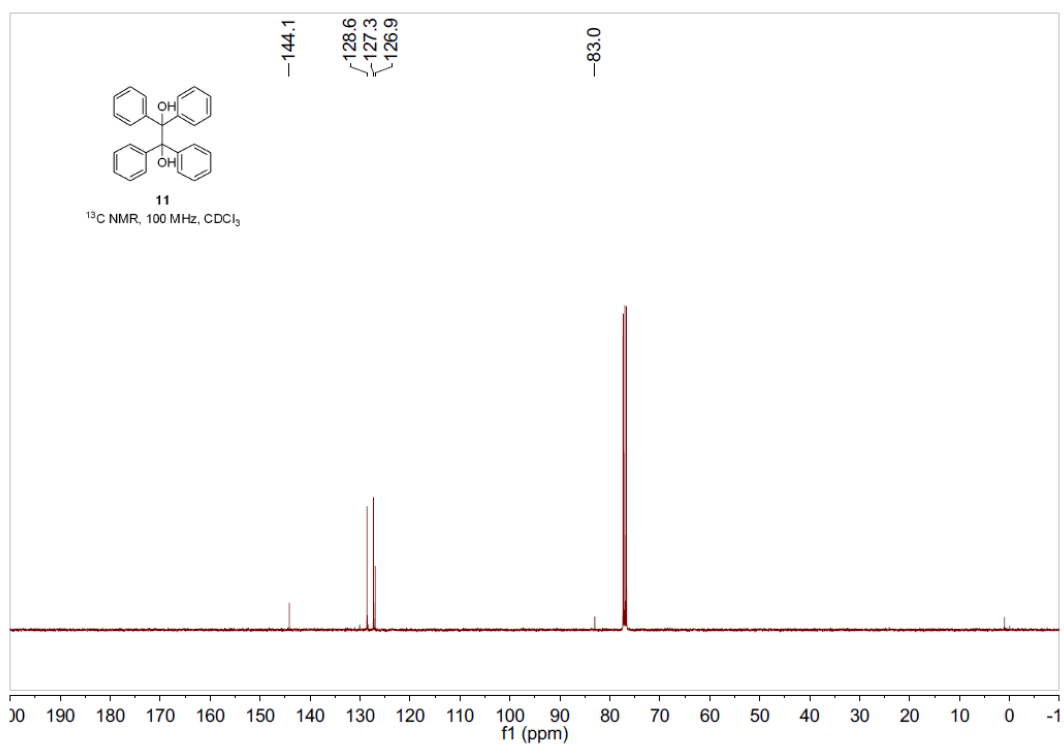

Figure S23. <sup>13</sup>C NMR spectrum of **11**.

The phenylethanol **12** is a white solid. The NMR data is consistent with the literature reports.<sup>6</sup>  
<sup>1</sup>H NMR (400 MHz, CDCl<sub>3</sub>) δ 7.40–7.32 (m, 8H), 7.29–7.24 (m, 2H), 5.85 (d, *J* = 3.5 Hz, 1H), 2.23 (d, *J* = 3.5 Hz, 1H).

<sup>13</sup>C NMR (100 MHz, CDCl<sub>3</sub>) δ 143.8, 128.5, 127.6, 126.5, 76.3.

HRMS (ESI): calculated for C<sub>13</sub>H<sub>12</sub>ONa [M+Na]<sup>+</sup> : 207.0786, found: 207.0787.

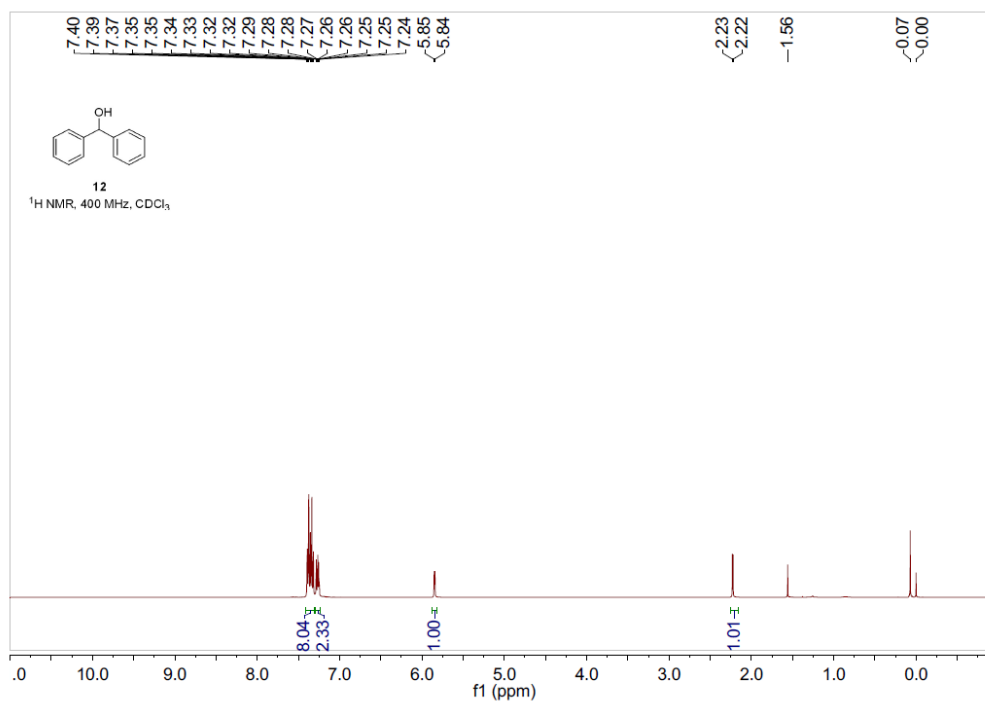

**Figure S24.** <sup>1</sup>H NMR spectrum of **12**.

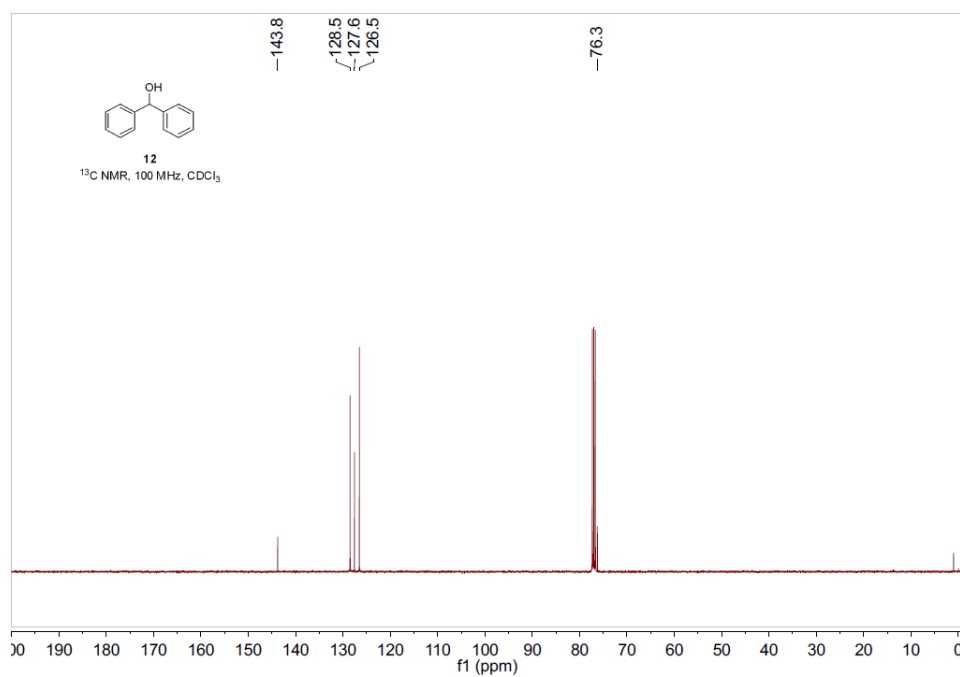

**Figure S25.** <sup>13</sup>C NMR spectrum of **12**.

## 6. References

- [1] A. M. Costero, J. Sanchis, S. Peransi, S. Gil, V. Sanz and A. Domenech, *Tetrahedron*. 2004, **60**, 4683-4691.
- [2] S. M. Choi, S.-H. Kwon and M. H. Yi, *J. Appl. Polym.* 2006, **100**, 2252-2258.
- [3] Y. Gao, H. Wang, J. Jia, Z. Pan, X. Ren, X. Zhi, Y. Zhang, X. Du, X. Wang and J. Liu, *Polymers*. 2022, **14**, 3733.
- [4] D.-H. Wang and G. C. Levy, *Acta. Polym. Sin.* 1988, **2**, 157-160.
- [5] J. Chen, Q. Lian, X. Jiang, J. Zhang, X. Luo, J. Fang and W. Wei, *Green Chem.* 2024, **26**, 5471-5476.
- [6] Q. Yu, D. Zhou, Y. Liu, X. Huang, C. Song, J. Ma and J. Li, *Org. Lett.* 2023, **25**, 47-52.
